# Supplementary material
Source: publisher figshare collection journal article supplement (https://acs.figshare.com/ndownloader/files/25794204)
Supplement: Supplementary file 1 [file 25794204]

Supporting Information For

## **Phase Engineering of Epitaxial Stanene on Surface Alloy**

Dechun Zhou<sup>†, #</sup>, Heping Li<sup>‡, #</sup>, Saiyu Bu<sup>‡</sup>, Benwu Xin<sup>‡</sup>, Yixuan Jiang<sup>†</sup>, Nan Si<sup>†</sup>, Jiao Sun<sup>†</sup>, Qingmin Ji<sup>†</sup>, Han Huang<sup>§</sup>, Hui Li<sup>\*, ‡</sup>, Tianchao Niu<sup>\*, ‡</sup>

<sup>†</sup> Herbert Gleiter Institute of Nanoscience, School of Material Science and Engineering, Nanjing University of Science & Technology, Nanjing 210094, China

<sup>‡</sup> Beijing Advanced Innovation Center for Soft Matter Science and Engineering, Beijing University of Chemical Technology, Beijing 100029, China

<sup>§</sup> Hunan Key Laboratory of Super-Microstructure and Ultrafast Process, College of Physics and Electronics, Central South University, Changsha 410083, China

<sup>‡</sup> School of Mechanical Engineering, Shanghai Jiao Tong University, Shanghai 200240, China

\* Corresponding Authors:

hli@buct.edu.cn (H. L.); niutianchao1415@sjtu.edu.cn (T. N.)

# D. Z. and H. L. contributed equally to this work.

## Experimental and Computational Methods

**Deposition of Sn.** Au(111) single crystal was cleaned by cycles of Ar ion sputtering (1.1 keV,  $1.5 \times 10^{-5}$  mbar) and e-beam heating in ultrahigh vacuum at 660 K. The surface was characterized by STM to show the typical herringbone reconstruction.<sup>1</sup> The Au<sub>2</sub>Sn alloy surface was prepared by deposition of Sn onto the clean Au(111) surface followed by annealing at 600 K for 20 min. The surface structure and uniformity was measured by STM before the further deposition of Sn. Then, Sn was deposited onto Au<sub>2</sub>Sn(111) surface at RT from a well-degassed boron nitride crucible (1073 K). To reveal the growth mechanism and explore the intermediates, the substrate temperature during deposition and annealing temperature after deposition were delicately controlled.

**Scanning Tunneling Microscopy.** The STM experiments were performed using an SPECS JT-SPM equipped with a Nanonis controller in an operating pressure of  $2 \times 10^{-10}$  Torr.<sup>1</sup> The STM images were obtained at liquid nitrogen temperature (77 K) with electrochemically etched W tips in a constant current mode. STS measurements were collected using a lock-in amplifier by applying a small periodic modulation to the applied voltage (15 mV, 833 Hz).

**Computational Details.** DFT calculations were performed with the Vienna Ab initio Simulation Package (VASP)<sup>2</sup> using the Perdew–Burke–Ernzerh (PBE) functional<sup>3</sup> in conjunction with the projector-augmented-wave (PAW) pseudopotential and a plane wave basis set ( $E_{\text{cutoff}} = 300$  eV). The van der Waals correction was also included in the DFT calculations. In order to obtain accurate atomic structure, four layers of Au substrates were used, where the bottom two layers of gold are fixed, and the atoms of the stanene layer and the topmost two layers of Au<sub>2</sub>Sn substrate are fully relaxed. A vacuum space of 15 Å along the  $z$  direction was applied to eliminate the image interaction. The structures were relaxed until the maximum atomic force is  $< 0.01$  eV/Å. The  $3 \times 3 \times 1$  k-point grids were used in the optimization of the stanene on substrate. The band structure of epitaxial stanene was derived at the PBE+SOC level with the  $20 \times 20 \times 1$  k-point grids.

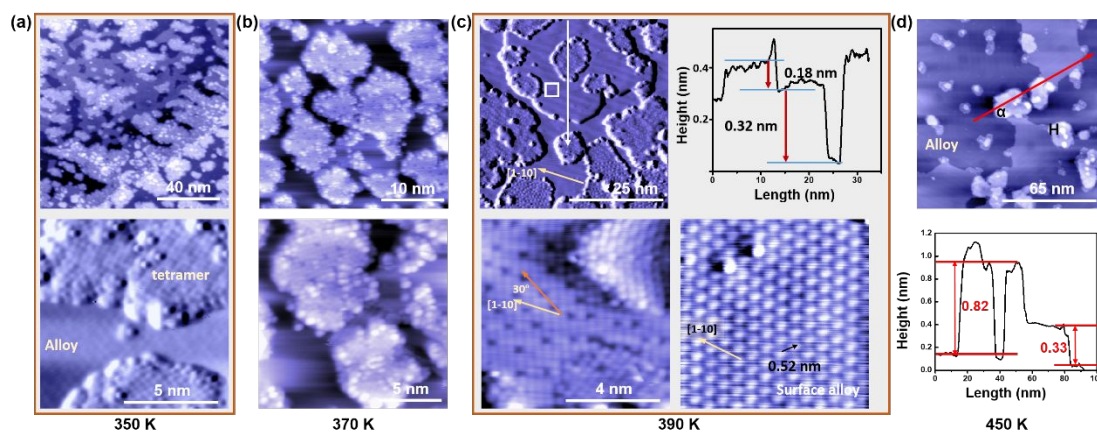

**Fig. S1.** Substrate-temperature-dependent surface morphology of direct deposition onto  $\text{Au}_2\text{Sn}(111)$  alloy. The temperature is indicated under each panel, respectively. Scanning parameters: (a) 1.4 V, 100 pA (top); 400 mV, 400 pA (bottom); (b) 1.2 V, 100 pA (both panels); (c) 500 mV, 300 pA (top left); 10 mV, 770 pA (bottom left); 10 mV, 2.2 nA (bottom right); (d) 1.8 V, 80 pA

At relatively low substrate temperature, direct deposition leads to larger Sn island than those obtained under high temperature (Figure S1a and 1b). Meanwhile, the Sn tetramer and vacancy dominate the whole surface species (Figure S1a and 1b). It is noted that high temperature induces the apparent generation of  $\text{Au}_2\text{Sn}$  alloy islands adjacent to the Sn aggregates (Figure S1c). The  $\alpha$ -stanene starts to evolve above 450 K. It has a height of  $\sim 0.82$  nm, and prefers to be generated at the edges (Figure S1d).

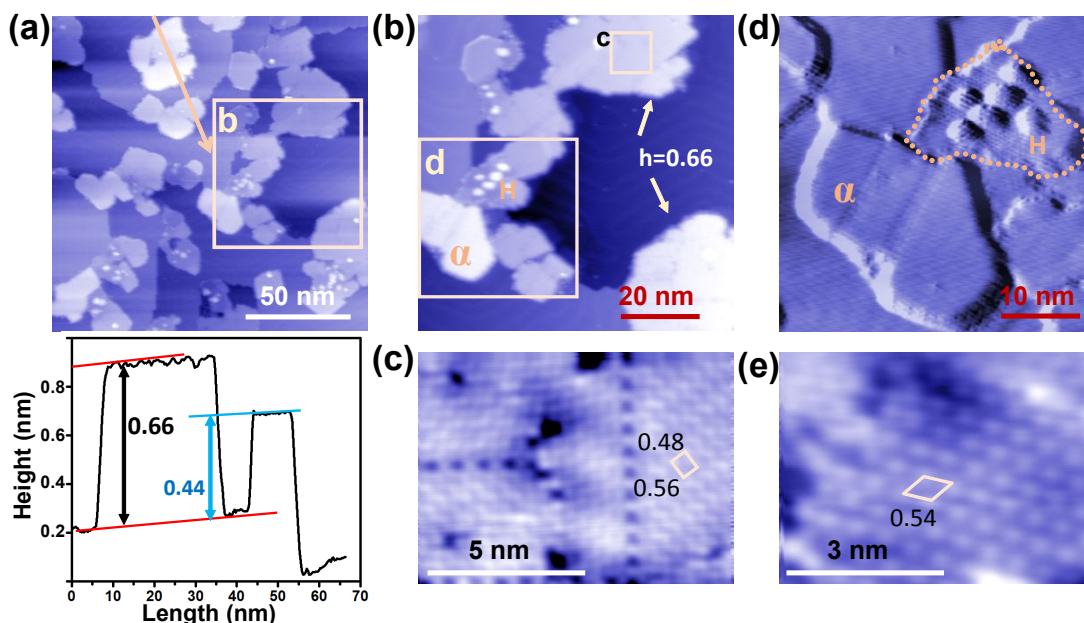

**Fig. S2.** Annealing at 450 K for 20 min. The Sn thin films were firstly prepared by direct deposition of Sn onto the  $\text{Au}_2\text{Sn}(111)$  held at 390 K. Scanning parameters: (a) - 1.5 V, 120 pA; (b) -1 V, 100 pA; (c) -10 mV, 2.2 nA; (d) -100 mV, 400 pA; (e) -20 mV, 800 pA

Nearly 90% of the Sn domains transits to  $\alpha$ -phase after annealing at 450 K for 20 min. Figure S2a shows a large-scale STM image of the distribution of Sn islands. The island located inside of the terrace is 0.22 nm higher than those at the step edges, but features the identical  $\alpha$ -phase. The height difference corresponds to an atomic layer underneath. There is abundance of linear boundaries within each  $\alpha$ -stanene island. The zoom-in scans reveal the presence of hexagonal dot arrays near the step edges.

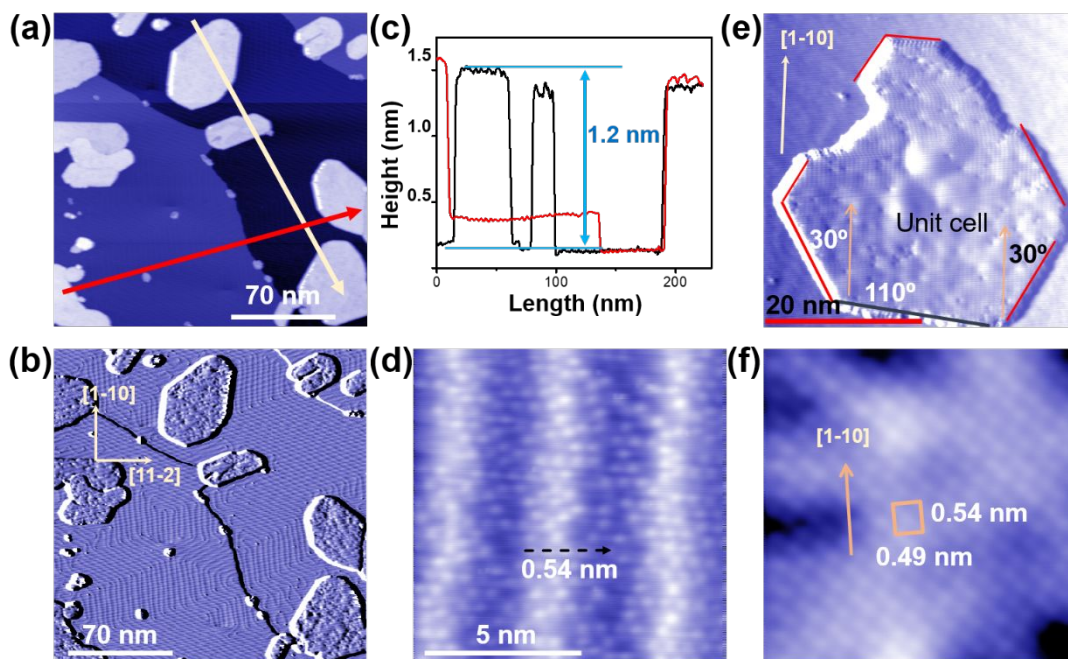

**Fig. S3.** Further annealing the sample shown in Figure S2 to 530 K. All the Sn islands transform to the  $\alpha$ -phase, leaving the bare area with  $\text{Au}_2\text{Sn}$  (111) surface alloy. Scanning parameters: (a) and (b) 1.6 V, 60 pA; (d) 20 mV, 2 nA; (e) 300 mV, 500 pA; (f) 20 mV, 500 pA

It is quite interesting to note that annealing at 530 K leads to the complete transformation to the  $\alpha$ -phase. Measured line-profiles present an average height of 1.2 nm for the  $\alpha$ -stanene. This value is much larger than the  $\alpha$ -stanene prepared at low temperature (0.66~0.8 nm). Furthermore, in contrast to other conditions that 530K annealing generates wholly the  $\beta$ -stanene, the ultrastable  $\alpha$ -phase should be ascribed to the presence of a buffer layer between the alloy surface and stanene. The herringbone reconstruction of Au(111) in bare area is still visible, while the short-range ordered bright atoms exhibit an interatomic distance of 0.54 nm. The edges of  $\alpha$ -stanene island are either sharp or rough that depend on the rotation angle with respect to the lattice of stanene. Atomically resolved STM image in Figure S3f shows a rectangle unit cell of 0.49 nm by 0.54 nm, whereas the dark and bright areas are due to the modulation by underlying buffer layer.



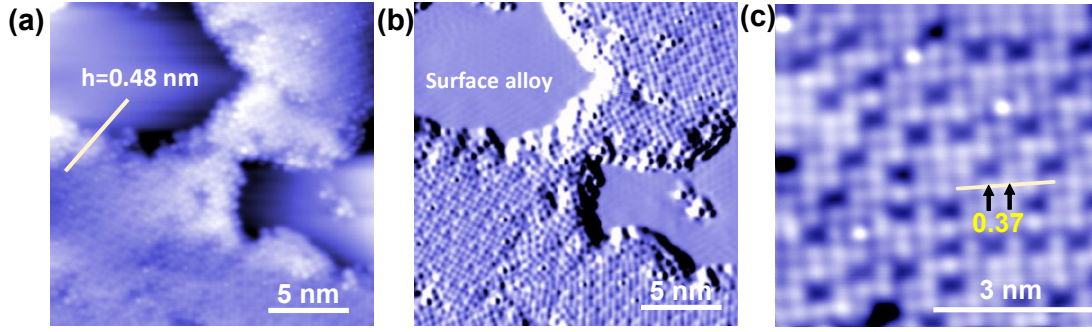

**Fig. S4.** Direct deposition of Sn onto Au<sub>2</sub>Sn(111) held at 330 K, followed by annealing at 370 K for 20 min. Scanning parameters: (a) and (b) 150 mV, 1 nA; (c) -120 mV, 1 nA

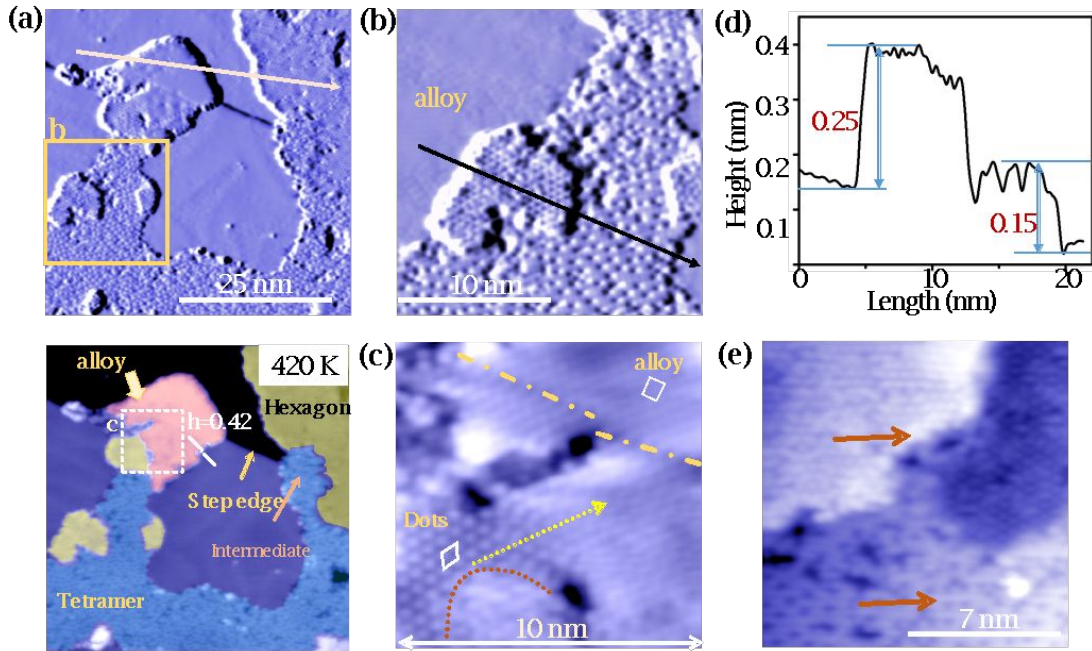

**Fig. S5.** Further annealing the sample shown in Figure S4 at 420 K for 20 min. Scanning parameters: (a) 600 mV, 200 pA; (b) 600 mV, 800 pA; (c) 100 mV, 1 nA; (e) 200 mV, 800 pA

Phase transition occurs at 420 K including the generation of hexagonal dot arrays and  $2\times\sqrt{3}$  surface alloy. It is noted that the  $\alpha$ -phase emanates from the substrate steps showing a rectangular shape. The height of alloy is 0.74 nm, 0.3 nm higher than the hexagonal dot arrays, signaling the presence of a buffer layer underneath. Due to the

low substrate temperature, there are randomly distributed vacancies within the alloy domain. The vacancy is one missing atom with a size comparable to the Sn tetramer vacancy that can be considered as the precursor. Meanwhile, annealing also generates hexagonal dot arrays at the edges of Sn islands which are unidirectionally aligned with the densely packed direction of Sn tetramers.

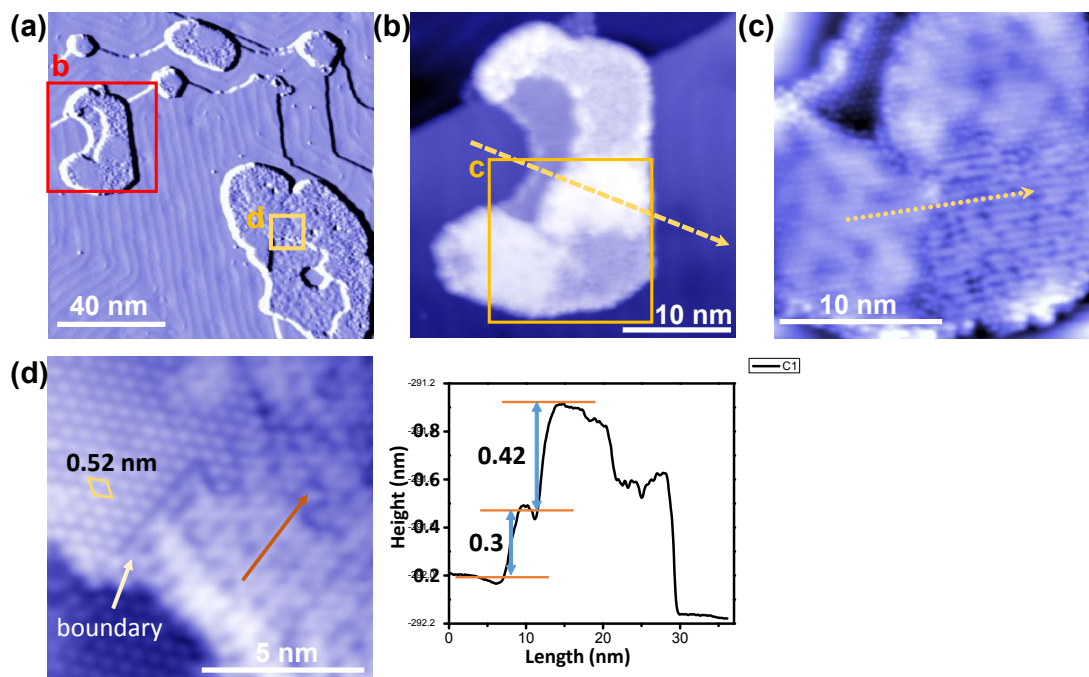

**Fig. S6.** Increasing the annealing temperature to 470 K and maintaining for 30 min. Tetramer and vacancies wholly disappeared, which transit to hexagonal dot arrays and  $\beta$ -stanene.<sup>4</sup> Scanning parameters: (a) 1.8 V, 80 pA; (b) 1 V, 200 pA; (c) 400 mV, 600 pA; (d) 100 mV, 1 nA

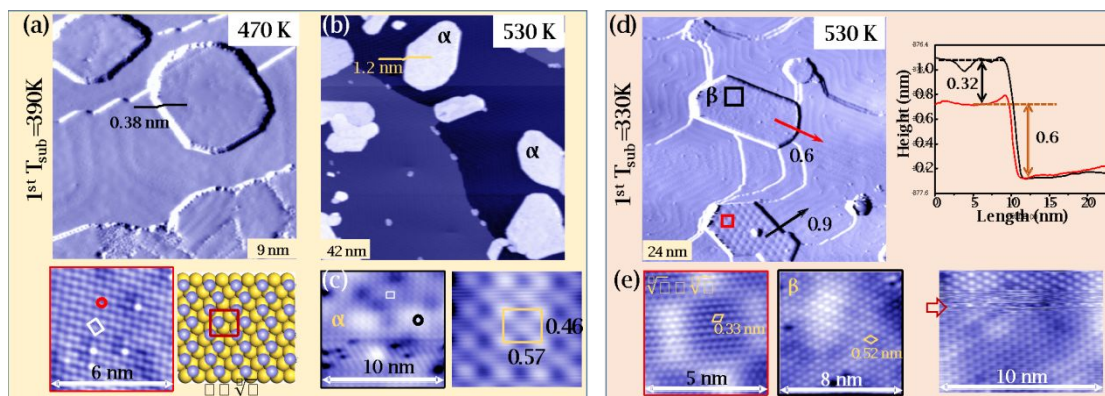

**Fig. S7.** (a) Keep the substrate at 390 K at the first deposition of Sn, followed by

annealing at 470 K, leading to the  $2 \times \sqrt{3}$  surface alloy; and (b) 530 K, generating the  $\alpha$ -stanene; (c) Zoom-in scan of the bright island in (b), showing a two-fold symmetry and a rectangle unit cell; (d) Substrate temperature is 330 K during the initial deposition. Further annealing at 530 K leads to a hexagonal phase and a Moiré pattern. The line profiles are taken across the hexagonal (black) and Moiré islands (red). (e) Atomically resolved STM images of (from left to right) hexagonal phase, Moiré pattern and tip-change on the hexagonal phase. Scanning parameters: (a) 500 mV, 100 pA (top); 100 mV, 800 pA (bottom); (b) 1.6 V, 60 pA (c) -50 mV, 600 pA; (left: large-area STM image; right: atomically resolved STM image) (d) 2.2 V, 80 pA; (e) -300 mV, 600 pA (left); 200 mV, 600 pA (middle) and 100 mV, 200 pA (right).

Figure S7a shows the Sn islands after annealing at 470 K. Atomically resolved STM image reveals a zigzag pattern with a rectangle unit cell of  $0.58 \times 0.5 \text{ nm}^2$ . Although the lattice size is quite similar with the  $\alpha$ -stanene (4.73 Å, 5.85 Å), the layer thickness is only 0.38 nm that is much lower than the puckering height of  $\alpha$ -stanene. The packing structure of one-atomic layer Sn atoms is depicted to be a  $2 \times \sqrt{3}$  superstructure<sup>5</sup> (atomic model in low panel, Figure S7a). Further annealing the sample to 530 K results in as well a two-fold symmetric lattice but with a much larger layer thickness (1.2 nm) than the  $2 \times \sqrt{3}$  superstructure, which can be assigned to the  $\alpha$ -stanene (Figure S7b). Panels in Figure S7c are high-resolution STM images showing a rectangle unit cell of  $0.46 \times 0.57 \text{ nm}^2$  that is close to  $\alpha$ -stanene (4.73 Å, 5.85 Å). The much larger layer thickness suggests the presence of a wetting layer between stanene and substrate.

Figure S7d demonstrates two different phases exhibiting layer thickness of 0.6 nm and 0.92 nm, respectively (line profiles). Zoom-in scans (Figure S7e) are taken in different phases as marked in Figure S7d.



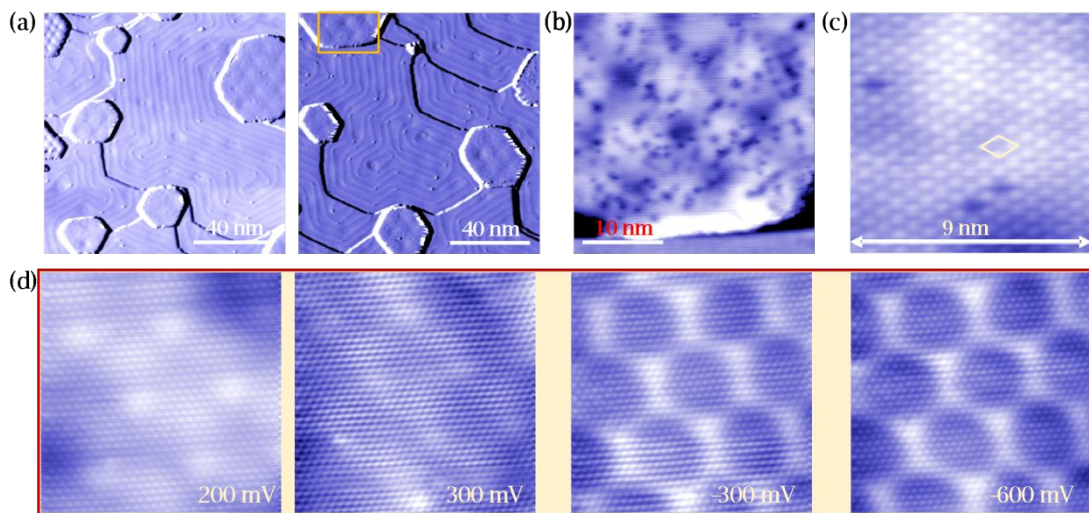

**Fig. S8.** Evolution of  $\beta$ -phase stanene and  $\text{Au}_2\text{Sn}(111)$  Moiré pattern after annealing at 530 K. Scanning parameters: (a) 2 V, 100 pA (left); 1.8 V, 80 pA (right); (b) 500 mV, 300 pA; (c) 100 mV, 800 pA; (d) from left to right: 200 mV, 600 pA; 300 mV, 600 pA; -300 mV, 600 pA; -600 mV, 1.2 nA.

530 K annealing induces severe desorption of Sn species but the evolution of two hexagonal phases. The first one exhibits a rhombus lattice of 0.54 nm. The second case demonstrates a Moiré superlattice at negative sample bias with a lattice constant of 0.33 nm. This value matches well with that of the  $\text{Au}_2\text{Sn}(111)$ .

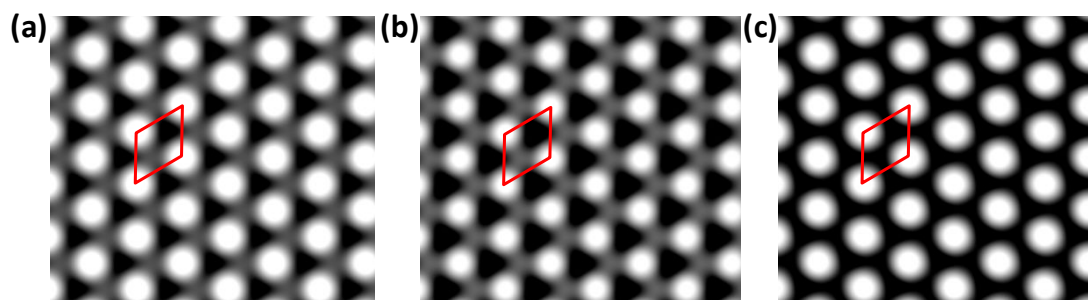

**Fig. S9.** Simulated STM topographic images of BLP-like stanene taken at different energy ranges: (a) -1 – 1 eV; (b) 0 – 1 eV; (c) -1 – 0 eV.

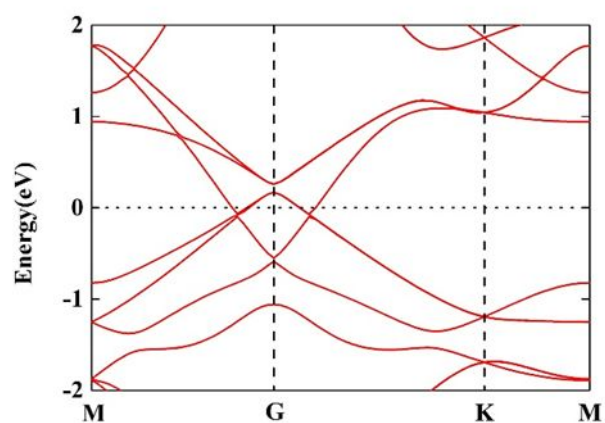

**Fig. S10.** Calculated band structure of freestanding stanene with a lattice constant of 0.5 nm, corresponding to a 7.07 % tensile strain.

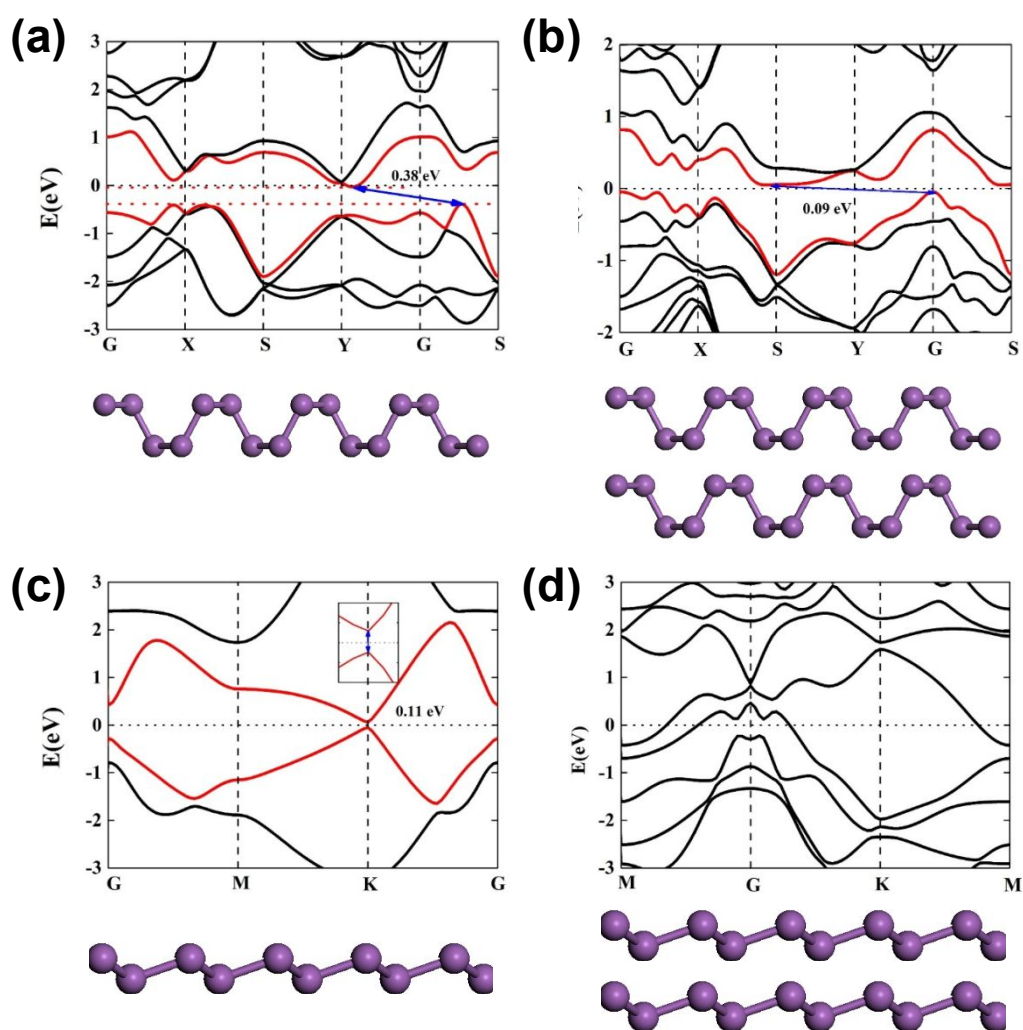

**Fig. S11.** Theoretically optimized atomic structures and band structures of  $\alpha$ - and  $\beta$ -

stanene. (a) monolayer  $\alpha$ -stanene; (b) bilayer  $\alpha$ -stanene; (c) monolayer  $\beta$ -stanene; (d) bilayer  $\beta$ -stanene.

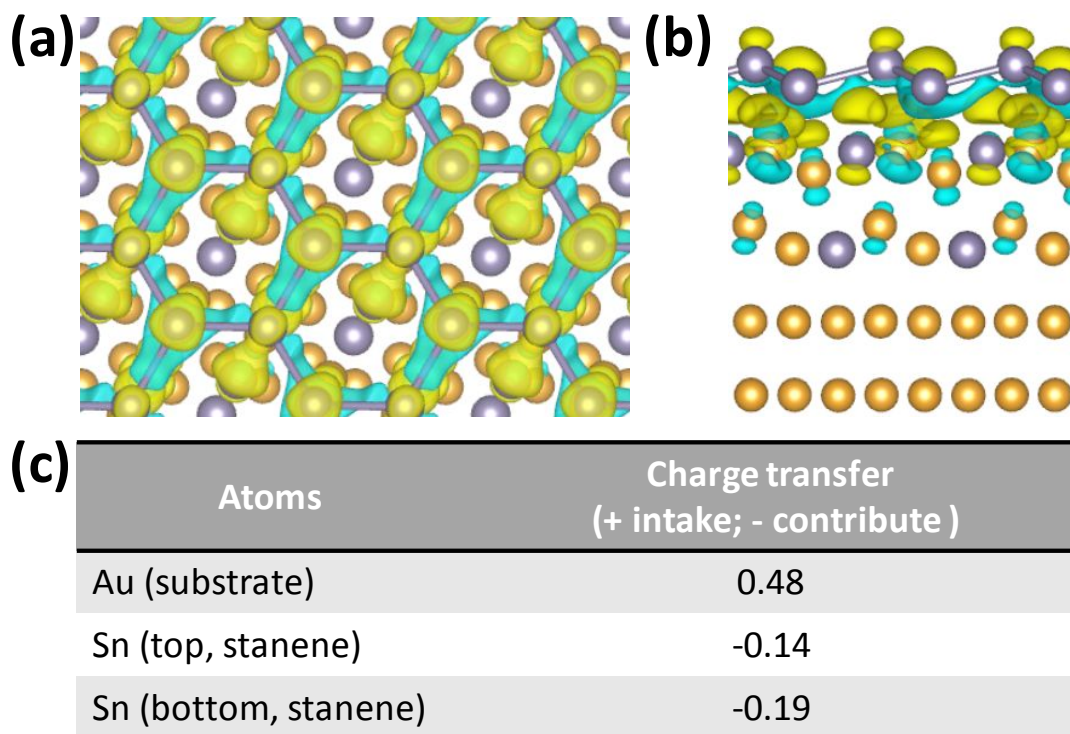

**Fig. S12.** (a) Top and (b) side views of the isosurface of the charge-density redistribution of BLP-like stanene on  $\text{Au}_2\text{Sn}(111)$  surface. Blue and yellow colors indicate electron depletion and accumulation, respectively (isosurface value,  $0.002 \text{ e}/\text{\AA}^3$ ). (c) Calculated the number of electron per atom in the charge transfer system.

## References

- (1) Si, N.; Shen, T.; Zhou, D. C.; Tang, Q.; Jiang, Y.; Ji, Q.; Huang, H.; Liu, W.; Li, S.; Niu, T. Imaging and Dynamics of Water Hexamer Confined in Nanopores. *ACS Nano* **2019**, *13*, 10622-10630.
- (2) Giannozzi, P.; Baroni, S.; Bonini, N.; Calandra, M.; Car, R.; Cavazzoni, C.; Ceresoli, D.; Chiarotti, G. L.; Cococcioni, M.; Dabo, I. QUANTUM ESPRESSO: a Modular and Open-Source Software Project for Quantum Simulations of Materials. *J. Phys.: Condens. Matter*. **2009**, *21*, 395502.
- (3) Perdew, J. P.; Burke, K.; Ernzerhof, M. Generalized Gradient Approximation Made Simple. *Phys. Rev. Lett.* **1996**, *77*, 3865-3868.
- (4) Liu, C.-C.; Jiang, H.; Yao, Y. Low-Energy Effective Hamiltonian Involving Spin-Orbit Coupling in Silicene and Two-Dimensional Germanium and Tin. *Phys. Rev. B* **2011**, *84*, 195430.
- (5) Sadhukhan, P.; Pandey, D.; Singh, V. K.; Sarkar, S.; Rai, A.; Bhattacharya, K.; Chakrabarti, A.; Roy Barman, S. Electronic Structure and Morphology of Thin Surface Alloy Layers Formed by Deposition of Sn On Au(1 1 1). *Appl. Surf. Sci.* **2020**, *506*, 144606.
